# Supplementary material for: A shortened verbal autopsy instrument for use in routine mortality surveillance systems
Source: BMC Med. 2015 Dec 16;13:302. doi: 10.1186/s12916-015-0528-8 (PMC4681088; doi:10.1186/s12916-015-0528-8)
Supplement: Additional file 4: — Sensitivity by cause for each module in full and shortened PHMRC VAI. (XLSX 15 kb) [file 12916_2015_528_MOESM4_ESM.xlsx]

## Sheet: Sheet1
Additional file 4. Sensitivity by cause for each module in full and shortened PHMRC VAI
Adult Causes	Full PHMRC VAI				Shortened PHMRC VAI
	No Text		Text		No Text		Text		Checklist
	Median (%)	95% CI	Median (%)	95% CI	Median (%)	95% CI	Median (%)	95% CI	Median (%)	95% CI
GBD Cause Group A: Communicable, maternal, neonatal and nurtritional disorders
AIDS	0.459	(0.454, 0.467)	0.525	(0.520, 0.532)	0.456	(0.452, 0.463)	0.552	(0.544, 0.559)	0.484	(0.476, 0.492)
Diarrhea/Dysentery	0.383	(0.370, 0.386)	0.404	(0.396, 0.411)	0.439	(0.429, 0.447)	0.412	(0.404, 0.421)	0.4	(0.387, 0.404)
Malaria	0.44	(0.440, 0.455)	0.591	(0.571, 0.600)	0.36	(0.353, 0.360)	0.5	(0.480, 0.520)	0.478	(0.440, 0.480)
Maternal	0.692	(0.685, 0.701)	0.69	(0.683, 0.694)	0.69	(0.684, 0.696)	0.673	(0.667, 0.676)	0.67	(0.667, 0.675)
Other Infectious Diseases	0.091	(0.091, 0.095)	0.184	(0.180, 0.190)	0.06	(0.053, 0.061)	0.167	(0.159, 0.169)	0.076	(0.068, 0.076)
Pneumonia	0.083	(0.080, 0.085)	0.177	(0.172, 0.180)	0.082	(0.078, 0.085)	0.167	(0.164, 0.172)	0.194	(0.190, 0.200)
TB	0.439	(0.435, 0.448)	0.452	(0.448, 0.459)	0.438	(0.435, 0.446)	0.464	(0.455, 0.470)	0.467	(0.462, 0.475)
GBD Cause Group B: Non-communicable diseases
Acute Myocardial Infarction	0.413	(0.407, 0.420)	0.46	(0.452, 0.465)	0.44	(0.436, 0.448)	0.443	(0.436, 0.450)	0.481	(0.476, 0.489)
Asthma	0.6	(0.583, 0.667)	0.583	(0.583, 0.667)	0.583	(0.500, 0.583)	0.667	(0.667, 0.667)	0.583	(0.583, 0.583)
Breast Cancer	0.707	(0.694, 0.714)	0.755	(0.755, 0.771)	0.714	(0.708, 0.720)	0.776	(0.767, 0.778)	0.714	(0.697, 0.714)
COPD	0.4	(0.395, 0.415)	0.419	(0.405, 0.419)	0.372	(0.361, 0.372)	0.387	(0.375, 0.395)	0.395	(0.395, 0.405)
Cervical Cancer	0.718	(0.711, 0.718)	0.765	(0.744, 0.769)	0.684	(0.667, 0.692)	0.744	(0.722, 0.744)	0.692	(0.690, 0.711)
Cirrhosis	0.273	(0.267, 0.280)	0.526	(0.521, 0.533)	0.267	(0.260, 0.271)	0.529	(0.526, 0.538)	0.436	(0.429, 0.444)
Colorectal Cancer	0.089	(0.080, 0.120)	0.2	(0.200, 0.200)	0.12	(0.120, 0.120)	0.2	(0.174, 0.200)	0.12	(0.120, 0.120)
Diabetes	0.485	(0.478, 0.493)	0.524	(0.519, 0.531)	0.51	(0.500, 0.519)	0.538	(0.527, 0.544)	0.543	(0.532, 0.548)
Epilepsy	0.5	(0.500, 0.500)	0.583	(0.583, 0.600)	0.444	(0.417, 0.500)	0.583	(0.583, 0.667)	0.583	(0.500, 0.583)
Esophageal Cancer	0.7	(0.625, 0.700)	0.8	(0.800, 0.800)	0.6	(0.600, 0.600)	0.8	(0.800, 0.800)	0.6	(0.600, 0.600)
Leukemia/Lymphomas	0.308	(0.289, 0.308)	0.368	(0.359, 0.385)	0.308	(0.308, 0.313)	0.385	(0.361, 0.385)	0.333	(0.333, 0.333)
Lung Cancer	0.346	(0.346, 0.360)	0.308	(0.308, 0.308)	0.346	(0.346, 0.360)	0.269	(0.269, 0.294)	0.385	(0.375, 0.385)
Other Cardiovascular Diseases	0.329	(0.326, 0.333)	0.391	(0.383, 0.400)	0.35	(0.343, 0.356)	0.402	(0.394, 0.407)	0.356	(0.349, 0.365)
Other Non-communicable Diseases	0.143	(0.139, 0.146)	0.171	(0.167, 0.175)	0.113	(0.110, 0.117)	0.16	(0.155, 0.164)	0.116	(0.112, 0.120)
Prostate Cancer	0.5	(0.500, 0.500)	0.667	(0.636, 0.667)	0.5	(0.500, 0.583)	0.667	(0.583, 0.667)	0.5	(0.500, 0.583)
Renal Failure	0.125	(0.122, 0.129)	0.31	(0.307, 0.317)	0.126	(0.125, 0.132)	0.317	(0.313, 0.324)	0.268	(0.262, 0.275)
Stomach Cancer	0.188	(0.188, 0.188)	0.313	(0.313, 0.375)	0.188	(0.188, 0.188)	0.375	(0.375, 0.375)	0.188	(0.188, 0.188)
Stroke	0.487	(0.481, 0.493)	0.518	(0.513, 0.524)	0.464	(0.458, 0.469)	0.513	(0.506, 0.519)	0.476	(0.471, 0.486)
GBD Cause Group C: Injuries
Bite of Venomous Animal	0.875	(0.875, 0.875)	0.813	(0.813, 0.813)	0.875	(0.875, 0.875)	0.813	(0.813, 0.813)	0.875	(0.875, 0.875)
Drowning	0.846	(0.840, 0.846)	0.818	(0.808, 0.846)	0.846	(0.840, 0.846)	0.846	(0.808, 0.846)	0.844	(0.818, 0.846)
Falls	0.584	(0.581, 0.595)	0.605	(0.600, 0.615)	0.561	(0.558, 0.579)	0.605	(0.600, 0.610)	0.578	(0.565, 0.581)
Fires	0.714	(0.700, 0.733)	0.727	(0.700, 0.733)	0.733	(0.722, 0.733)	0.733	(0.708, 0.733)	0.7	(0.700, 0.720)
Homicide	0.738	(0.732, 0.739)	0.794	(0.786, 0.805)	0.733	(0.725, 0.738)	0.786	(0.786, 0.800)	0.739	(0.738, 0.757)
Other Injuries	0.692	(0.692, 0.692)	0.731	(0.708, 0.731)	0.692	(0.692, 0.692)	0.692	(0.680, 0.692)	0.692	(0.692, 0.692)
Poisonings	0.364	(0.364, 0.364)	0.591	(0.571, 0.591)	0.318	(0.286, 0.318)	0.571	(0.545, 0.591)	0.5	(0.455, 0.500)
Road Traffic	0.78	(0.778, 0.794)	0.82	(0.820, 0.830)	0.8	(0.786, 0.800)	0.82	(0.820, 0.825)	0.8	(0.800, 0.813)
Suicide	0.103	(0.097, 0.125)	0.125	(0.103, 0.129)	0.097	(0.097, 0.100)	0.103	(0.097, 0.125)	0.161	(0.143, 0.161)
Child Causes	Full PHMRC VAI				Shortened PHMRC VAI
	No Text		Text		No Text		Text		Checklist
	Median (%)	95% CI	Median (%)	95% CI	Median (%)	95% CI	Median (%)	95% CI	Median (%)	95% CI
GBD Cause Group A: Communicable, maternal, neonatal and nurtritional disorders
AIDS	0.4	(0.400, 0.400)	0.6	(0.600, 0.600)	0.4	(0.400, 0.400)	0.6	(0.600, 0.600)	0.6	(0.400, 0.600)
Diarrhea/Dysentery	0.282	(0.276, 0.291)	0.4	(0.393, 0.412)	0.319	(0.313, 0.333)	0.421	(0.414, 0.429)	0.414	(0.404, 0.426)
Encephalitis	0.4	(0.400, 0.400)	0.444	(0.400, 0.500)	0.4	(0.400, 0.400)	0.444	(0.400, 0.500)	0.4	(0.400, 0.400)
Hemorrhagic fever	0.538	(0.538, 0.556)	0.615	(0.615, 0.667)	0.538	(0.538, 0.538)	0.615	(0.615, 0.667)	0.692	(0.692, 0.700)
Malaria	0.448	(0.429, 0.455)	0.593	(0.586, 0.615)	0.412	(0.393, 0.417)	0.586	(0.583, 0.607)	0.455	(0.448, 0.474)
Measles	0.833	(0.833, 0.833)	0.833	(0.833, 0.833)	0.833	(0.833, 0.833)	0.833	(0.833, 0.833)	0.833	(0.833, 1.000)
Meningitis	0.308	(0.286, 0.357)	0.333	(0.308, 0.357)	0.308	(0.286, 0.333)	0.333	(0.286, 0.357)	0.357	(0.333, 0.357)
Other Infectious Diseases	0.118	(0.118, 0.143)	0.3	(0.294, 0.333)	0.118	(0.118, 0.125)	0.313	(0.294, 0.333)	0.279	(0.250, 0.294)
Pneumonia	0.121	(0.115, 0.125)	0.142	(0.135, 0.150)	0.116	(0.111, 0.123)	0.144	(0.138, 0.151)	0.167	(0.158, 0.175)
Sepsis	0.167	(0.156, 0.176)	0.188	(0.182, 0.200)	0.206	(0.188, 0.208)	0.19	(0.182, 0.206)	0.188	(0.182, 0.206)
GBD Cause Group B: Non-communicable diseases
Other Cancers	0.286	(0.286, 0.333)	0.429	(0.429, 0.429)	0.333	(0.286, 0.429)	0.429	(0.429, 0.429)	0.429	(0.429, 0.429)
Other Cardiovascular Diseases	0.158	(0.158, 0.167)	0.368	(0.368, 0.368)	0.158	(0.154, 0.158)	0.368	(0.368, 0.368)	0.333	(0.316, 0.353)
Other Defined Causes of Child Deaths	0.101	(0.093, 0.106)	0.209	(0.200, 0.222)	0.095	(0.089, 0.104)	0.208	(0.200, 0.214)	0.178	(0.171, 0.188)
Other Digestive Diseases	0.083	(0.083, 0.091)	0.25	(0.250, 0.273)	0.083	(0.083, 0.083)	0.25	(0.250, 0.273)	0.25	(0.250, 0.250)
GBD Cause Group C: Injuries
Bite of Venomous Animal	0.929	(0.929, 0.929)	0.929	(0.929, 1.000)	0.929	(0.929, 0.929)	0.929	(0.929, 1.000)	0.929	(0.929, 0.929)
Drowning	0.905	(0.900, 0.905)	0.941	(0.929, 0.950)	0.905	(0.900, 0.905)	0.941	(0.929, 0.950)	0.905	(0.905, 0.905)
Falls	0.75	(0.750, 0.750)	0.75	(0.750, 0.750)	0.75	(0.750, 0.750)	0.75	(0.750, 0.750)	0.8	(0.750, 0.833)
Fires	0.706	(0.706, 0.706)	0.765	(0.750, 0.765)	0.706	(0.706, 0.706)	0.765	(0.750, 0.765)	0.706	(0.706, 0.706)
Poisonings	0.5	(0.500, 0.500)	0.75	(0.750, 0.750)	0.5	(0.500, 0.500)	0.75	(0.750, 0.750)	0.75	(0.750, 0.750)
Road Traffic	0.909	(0.900, 0.913)	0.913	(0.913, 0.929)	0.909	(0.905, 0.913)	0.913	(0.913, 0.933)	0.913	(0.913, 0.933)
Violent Death	0.846	(0.846, 0.846)	0.846	(0.846, 0.846)	0.846	(0.846, 0.846)	0.846	(0.846, 0.846)	0.846	(0.846, 0.846)
Neonate Causes	Full PHMRC VAI				Shortened PHMRC VAI
	No Text		Text		No Text		Text		Checklist
	Median (%)	95% CI	Median (%)	95% CI	Median (%)	95% CI	Median (%)	95% CI	Median (%)	95% CI
Birth asphyxia	0.35	(0.345, 0.355)	0.382	(0.376, 0.388)	0.353	(0.348, 0.360)	0.384	(0.379, 0.390)	0.382	(0.375, 0.386)
Congenital malformation	0.452	(0.441, 0.452)	0.456	(0.452, 0.468)	0.438	(0.435, 0.452)	0.452	(0.443, 0.460)	0.46	(0.452, 0.468)
Meningitis/Sepsis	0.482	(0.475, 0.490)	0.536	(0.526, 0.542)	0.447	(0.438, 0.453)	0.491	(0.482, 0.500)	0.479	(0.469, 0.488)
Pneumonia	0.429	(0.429, 0.476)	0.476	(0.476, 0.476)	0.429	(0.429, 0.429)	0.476	(0.476, 0.476)	0.476	(0.476, 0.500)
Preterm Delivery	0.513	(0.508, 0.519)	0.505	(0.500, 0.509)	0.5	(0.494, 0.504)	0.5	(0.495, 0.504)	0.511	(0.508, 0.517)
Stillbirth	0.881	(0.876, 0.885)	0.88	(0.876, 0.884)	0.848	(0.843, 0.851)	0.853	(0.848, 0.857)	0.853	(0.849, 0.857)
